# Supplementary material for: Sex Difference Trend in 5-Year Mortality Among Patients With Coronary Artery Disease: A 24,432 Chinese Cohort Study From 2007 to 2014
Source: Front Cardiovasc Med. 2022 Apr 12;9:774365. doi: 10.3389/fcvm.2022.774365 (PMC9039363; doi:10.3389/fcvm.2022.774365)
Supplement: Supplementary file 3 [file Data_Sheet_1.XLSX]

## Sheet: Table 1（男女总表）
	level	Overall	男	女	p	test
n		24432	18224	6208
age (mean (SD))		62.96 (10.72)	61.84 (10.86)	66.25 (9.55)	<0.001
age_3 (%)	1	9020 (36.9)	7542 (41.4)	1478 (23.8)	<0.001
	2	11716 (48.0)	8300 (45.5)	3416 (55.0)
	3	3696 (15.1)	2382 (13.1)	1314 (21.2)
gender (%)	1	18224 (74.6)	18224 (100.0)	0 (0.0)	<0.001
	2	6208 (25.4)	0 (0.0)	6208 (100.0)
AMI (%)	0	19088 (78.1)	13778 (75.6)	5310 (85.5)	<0.001
	1	5344 (21.9)	4446 (24.4)	898 (14.5)
ICD_HT (%)	0	10816 (44.3)	8754 (48.0)	2062 (33.2)	<0.001
	1	13616 (55.7)	9470 (52.0)	4146 (66.8)
ICD_DM (%)	0	18140 (74.2)	13914 (76.3)	4226 (68.1)	<0.001
	1	6292 (25.8)	4310 (23.7)	1982 (31.9)
ICD_AF (%)	0	23731 (97.1)	17750 (97.4)	5981 (96.3)	<0.001
	1	701 (2.9)	474 (2.6)	227 (3.7)
CHF (%)	0	9573 (84.4)	6905 (84.0)	2668 (85.4)	0.062
	1	1772 (15.6)	1317 (16.0)	455 (14.6)
ICD_STROKE (%)	0	23270 (95.2)	17369 (95.3)	5901 (95.1)	0.438
	1	1162 (4.8)	855 (4.7)	307 (4.9)
ICD_CANCER (%)	0	24164 (98.9)	18040 (99.0)	6124 (98.6)	0.03
	1	268 (1.1)	184 (1.0)	84 (1.4)
ICD_COPD (mean (SD))		0.01 (0.09)	0.01 (0.10)	0.00 (0.07)	<0.001
CKD (%)	0	17881 (77.5)	13502 (78.7)	4379 (74.1)	<0.001
	1	5179 (22.5)	3651 (21.3)	1528 (25.9)
PCI (%)	0	6426 (26.3)	4332 (23.8)	2094 (33.7)	<0.001
	1	18006 (73.7)	13892 (76.2)	4114 (66.3)
DES (%)	0	7575 (31.0)	5235 (28.7)	2340 (37.7)	<0.001
	1	16857 (69.0)	12989 (71.3)	3868 (62.3)
BES (%)	0	23318 (95.4)	17343 (95.2)	5975 (96.2)	<0.001
	1	1114 (4.6)	881 (4.8)	233 (3.8)
CMV (mean (SD))		144.49 (82.40)	149.44 (84.02)	130.09 (75.66)	<0.001
eGFR (mean (SD))		78.28 (25.05)	78.74 (24.22)	76.94 (27.28)	<0.001
WBC (mean (SD))		8.15 (2.93)	8.32 (2.96)	7.64 (2.78)	<0.001
HGB (mean (SD))		133.06 (16.73)	136.37 (16.17)	123.44 (14.48)	<0.001
LDLC (median [IQR])		2.65 [2.09, 3.31]	2.64 [2.08, 3.28]	2.71 [2.12, 3.38]	<0.001	nonnorm
HDLC (median [IQR])		0.97 [0.82, 1.15]	0.94 [0.80, 1.11]	1.07 [0.90, 1.26]	<0.001	nonnorm
HbA1c (mean (SD))		6.56 (1.39)	6.50 (1.37)	6.70 (1.43)	<0.001
LVEF (mean (SD))		59.70 (11.85)	58.95 (12.04)	61.92 (10.98)	<0.001
acei_arb (%)	0	10680 (44.7)	7636 (42.8)	3044 (50.3)	<0.001
	1	13194 (55.3)	10185 (57.2)	3009 (49.7)
Drug_B_blocker (%)	No	4193 (17.6)	3038 (17.0)	1155 (19.1)	<0.001
	YES	19681 (82.4)	14783 (83.0)	4898 (80.9)
Drug_Statins (%)	0	1470 (6.2)	956 (5.4)	514 (8.5)	<0.001
	1	22404 (93.8)	16865 (94.6)	5539 (91.5)
Drug_Aspirin (%)	0	2288 (9.6)	1476 (8.3)	812 (13.4)	<0.001
	1	21586 (90.4)	16345 (91.7)	5241 (86.6)
Drug_Clopidogrel (%)	0	3494 (14.6)	2173 (12.2)	1321 (21.8)	<0.001
	1	20380 (85.4)	15648 (87.8)	4732 (78.2)
Drug_CCB (%)	0	18669 (78.2)	14295 (80.2)	4374 (72.3)	<0.001
	1	5205 (21.8)	3526 (19.8)	1679 (27.7)
dis_status (%)	0	66 (0.3)	51 (0.3)	15 (0.2)	0.066
	1	24059 (98.5)	17961 (98.6)	6098 (98.2)
	2	216 (0.9)	154 (0.8)	62 (1.0)
	4	91 (0.4)	58 (0.3)	33 (0.5)
insurance_type (%)	1	5436 (22.3)	4240 (23.3)	1196 (19.3)	<0.001
	2	13168 (54.0)	9718 (53.5)	3450 (55.7)
	3	1407 (5.8)	1098 (6.0)	309 (5.0)
	4	4358 (17.9)	3122 (17.2)	1236 (20.0)
Follow_up_death_365d (%)	0	23555 (96.4)	17566 (96.4)	5989 (96.5)	0.792
	1	877 (3.6)	658 (3.6)	219 (3.5)
Follow_up_death_5y (%)	0	21774 (89.1)	16197 (88.9)	5577 (89.8)	0.038
	1	2658 (10.9)	2027 (11.1)	631 (10.2)

## Sheet: Table 2（男女时间基线表）
		2007-2010						2011-2014
	level	Overall	male	female	p		level	Overall	1	2	p
n		8643	6605	2038		n		15789	11619	4170
age (mean (SD))		62.81 (10.83)	61.68 (10.98)	66.46 (9.44)	<0.001	age (mean (SD))		63.05 (10.66)	61.93 (10.80)	66.15 (9.60)	<0.001
age_3 (%)	1	3225 (37.3)	2769 (41.9)	456 (22.4)	<0.001	age_3 (%)	1	5795 (36.7)	4773 (41.1)	1022 (24.5)	<0.001
	2	4185 (48.4)	3006 (45.5)	1179 (57.9)			2	7531 (47.7)	5294 (45.6)	2237 (53.6)
	3	1233 (14.3)	830 (12.6)	403 (19.8)			3	2463 (15.6)	1552 (13.4)	911 (21.8)
gender (%)	1	6605 (76.4)	6605 (100.0)	0 (0.0)	<0.001	gender (%)	1	11619 (73.6)	11619 (100.0)	0 (0.0)	<0.001
	2	2038 (23.6)	0 (0.0)	2038 (100.0)			2	4170 (26.4)	0 (0.0)	4170 (100.0)
AMI (%)	0	6533 (75.6)	4817 (72.9)	1716 (84.2)	<0.001	AMI (%)	0	12555 (79.5)	8961 (77.1)	3594 (86.2)	<0.001
	1	2110 (24.4)	1788 (27.1)	322 (15.8)			1	3234 (20.5)	2658 (22.9)	576 (13.8)
ICD_HT (%)	0	4014 (46.4)	3322 (50.3)	692 (34.0)	<0.001	ICD_HT (%)	0	6802 (43.1)	5432 (46.8)	1370 (32.9)	<0.001	、
	1	4629 (53.6)	3283 (49.7)	1346 (66.0)			1	8987 (56.9)	6187 (53.2)	2800 (67.1)
ICD_DM (%)	0	6535 (75.6)	5128 (77.6)	1407 (69.0)	<0.001	ICD_DM (%)	0	11605 (73.5)	8786 (75.6)	2819 (67.6)	<0.001
	1	2108 (24.4)	1477 (22.4)	631 (31.0)			1	4184 (26.5)	2833 (24.4)	1351 (32.4)
ICD_AF (%)	0	8405 (97.2)	6443 (97.5)	1962 (96.3)	0.003	ICD_AF (%)	0	15326 (97.1)	11307 (97.3)	4019 (96.4)	0.003
	1	238 (2.8)	162 (2.5)	76 (3.7)			1	463 (2.9)	312 (2.7)	151 (3.6)
CHF (%)	0	3991 (90.7)	2940 (90.4)	1051 (91.6)	0.264	CHF (%)	0	5582 (80.4)	3965 (79.8)	1617 (81.9)	0.053
	1	410 (9.3)	313 (9.6)	97 (8.4)			1	1362 (19.6)	1004 (20.2)	358 (18.1)
ICD_STROKE (%)	0	8294 (96.0)	6343 (96.0)	1951 (95.7)	0.588	ICD_STROKE (%)	0	14976 (94.9)	11026 (94.9)	3950 (94.7)	0.696
	1	349 (4.0)	262 (4.0)	87 (4.3)			1	813 (5.1)	593 (5.1)	220 (5.3)
ICD_CANCER (%)	0	8535 (98.8)	6524 (98.8)	2011 (98.7)	0.814	ICD_CANCER (%)	0	15629 (99.0)	11516 (99.1)	4113 (98.6)	0.01
	1	108 (1.2)	81 (1.2)	27 (1.3)			1	160 (1.0)	103 (0.9)	57 (1.4)
CKD (%)	0	5767 (74.2)	4476 (75.7)	1291 (69.1)	<0.001	CKD (%)	0	12114 (79.3)	9026 (80.3)	3088 (76.5)	<0.001
	1	2010 (25.8)	1433 (24.3)	577 (30.9)			1	3169 (20.7)	2218 (19.7)	951 (23.5)
ICD_COPD (%)	0	8565 (99.1)	6535 (98.9)	2030 (99.6)	0.008	ICD_COPD (%)	0	15654 (99.1)	11507 (99.0)	4147 (99.4)	0.017
	1	78 (0.9)	70 (1.1)	8 (0.4)			1	135 (0.9)	112 (1.0)	23 (0.6)
ICD_preAMI (%)	0	8643 (100.0)	6605 (100.0)	2038 (100.0)	NA	ICD_preAMI (%)	0	15789 (100.0)	11619 (100.0)	4170 (100.0)	NA
ICD_preCABG (%)	0	8643 (100.0)	6605 (100.0)	2038 (100.0)	NA	ICD_preCABG (%)	0	15789 (100.0)	11619 (100.0)	4170 (100.0)	NA
ICD_prePCI (%)	0	8643 (100.0)	6605 (100.0)	2038 (100.0)	NA	ICD_prePCI (%)	0	15789 (100.0)	11619 (100.0)	4170 (100.0)	NA
PCI (%)	0	2219 (25.7)	1595 (24.1)	624 (30.6)	<0.001	PCI (%)	0	4207 (26.6)	2737 (23.6)	1470 (35.3)	<0.001
	1	6424 (74.3)	5010 (75.9)	1414 (69.4)			1	11582 (73.4)	8882 (76.4)	2700 (64.7)
DES (%)	0	3007 (34.8)	2203 (33.4)	804 (39.5)	<0.001	DES (%)	0	4568 (28.9)	3032 (26.1)	1536 (36.8)	<0.001
	1	5636 (65.2)	4402 (66.6)	1234 (60.5)			1	11221 (71.1)	8587 (73.9)	2634 (63.2)
BES (%)	0	7770 (89.9)	5925 (89.7)	1845 (90.5)	0.299	BES (%)	0	15548 (98.5)	11418 (98.3)	4130 (99.0)	0.001
	1	873 (10.1)	680 (10.3)	193 (9.5)			1	241 (1.5)	201 (1.7)	40 (1.0)
CMV (mean (SD))		160.56 (91.09)	163.76 (92.38)	150.28 (86.03)	<0.001	CMV (mean (SD))		135.89 (75.97)	141.48 (77.87)	120.39 (68.05)	<0.001
Pre_CREA (mean (SD))		100.04 (58.02)	105.41 (62.46)	83.48 (36.77)	<0.001	Pre_CREA (mean (SD))		95.47 (67.41)	100.66 (67.62)	81.03 (64.69)	<0.001
eGFR (mean (SD))		73.94 (22.68)	74.72 (22.07)	71.52 (24.32)	<0.001	eGFR (mean (SD))		80.56 (25.92)	80.90 (25.04)	79.59 (28.25)	0.012
WBC (mean (SD))		8.29 (3.13)	8.44 (3.17)	7.82 (2.92)	<0.001	WBC (mean (SD))		8.07 (2.82)	8.26 (2.84)	7.56 (2.71)	<0.001
HGB (mean (SD))		133.59 (16.81)	136.53 (16.28)	124.20 (14.90)	<0.001	HGB (mean (SD))		132.80 (16.69)	136.29 (16.11)	123.09 (14.28)	<0.001
LDLC (median [IQR])		2.60 [2.06, 3.21]	2.58 [2.05, 3.19]	2.66 [2.09, 3.29]	0.003	LDLC (median [IQR])		2.69 [2.10, 3.37]	2.67 [2.09, 3.35]	2.73 [2.14, 3.43]	<0.001
HDLC (median [IQR])		1.02 [0.84, 1.21]	0.98 [0.82, 1.17]	1.13 [0.95, 1.32]	<0.001	HDLC (median [IQR])		0.95 [0.81, 1.12]	0.92 [0.79, 1.07]	1.05 [0.89, 1.23]	<0.001
HbA1c (mean (SD))		6.54 (1.32)	6.49 (1.30)	6.70 (1.37)	<0.001	HbA1c (mean (SD))		6.56 (1.42)	6.51 (1.40)	6.71 (1.45)	<0.001
LVEF (mean (SD))		60.13 (12.13)	59.25 (12.25)	62.97 (11.29)	<0.001	LVEF (mean (SD))		59.42 (11.66)	58.75 (11.90)	61.32 (10.76)	<0.001
acei_arb (%)	0	3010 (35.8)	2185 (34.0)	825 (41.8)	<0.001	acei_arb (%)	0	7670 (49.6)	5451 (47.8)	2219 (54.4)	<0.001
	1	5394 (64.2)	4244 (66.0)	1150 (58.2)			1	7800 (50.4)	5941 (52.2)	1859 (45.6)
Drug_B_blocker (%)	0	1405 (16.7)	1054 (16.4)	351 (17.8)	0.161	Drug_B_blocker (%)	0	2788 (18.0)	1984 (17.4)	804 (19.7)	0.001
	1	6999 (83.3)	5375 (83.6)	1624 (82.2)			1	12682 (82.0)	9408 (82.6)	3274 (80.3)
Drug_Statins (%)	0	633 (7.5)	452 (7.0)	181 (9.2)	0.002	Drug_Statins (%)	0	837 (5.4)	504 (4.4)	333 (8.2)	<0.001
	1	7771 (92.5)	5977 (93.0)	1794 (90.8)			1	14633 (94.6)	10888 (95.6)	3745 (91.8)
Drug_Aspirin (%)	0	762 (9.1)	529 (8.2)	233 (11.8)	<0.001	Drug_Aspirin (%)	0	1526 (9.9)	947 (8.3)	579 (14.2)	<0.001
	1	7642 (90.9)	5900 (91.8)	1742 (88.2)			1	13944 (90.1)	10445 (91.7)	3499 (85.8)
Drug_Clopidogrel (%)	0	1075 (12.8)	726 (11.3)	349 (17.7)	<0.001	Drug_Clopidogrel (%)	0	2419 (15.6)	1447 (12.7)	972 (23.8)	<0.001
	1	7329 (87.2)	5703 (88.7)	1626 (82.3)			1	13051 (84.4)	9945 (87.3)	3106 (76.2)
Drug_CCB (%)	0	6445 (76.7)	5052 (78.6)	1393 (70.5)	<0.001	Drug_CCB (%)	0	12224 (79.0)	9243 (81.1)	2981 (73.1)	<0.001
	1	1959 (23.3)	1377 (21.4)	582 (29.5)			1	3246 (21.0)	2149 (18.9)	1097 (26.9)
dis_status (%)	1	8470 (98.0)	6489 (98.2)	1981 (97.2)			1	15589 (98.7)	11472 (98.7)	4117 (98.7)
	2	103 (1.2)	74 (1.1)	29 (1.4)			2	113 (0.7)	80 (0.7)	33 (0.8)
	4	55 (0.6)	34 (0.5)	21 (1.0)			4	36 (0.2)	24 (0.2)	12 (0.3)
insurance_type (%)	1	3327 (38.5)	2640 (40.0)	687 (33.7)	<0.001	insurance_type (%)	1	2109 (13.4)	1600 (13.8)	509 (12.3)	<0.001
	2	3737 (43.2)	2746 (41.6)	991 (48.6)			2	9431 (60.0)	6972 (60.2)	2459 (59.2)
	3	634 (7.3)	513 (7.8)	121 (5.9)			3	773 (4.9)	585 (5.1)	188 (4.5)
	4	945 (10.9)	706 (10.7)	239 (11.7)			4	3413 (21.7)	2416 (20.9)	997 (24.0)
Follow_up_death_365d (%)	0	8326 (96.3)	6369 (96.4)	1957 (96.0)	0.438	Follow_up_death_365d (%)	0	15229 (96.5)	11197 (96.4)	4032 (96.7)	0.359
	1	317 (3.7)	236 (3.6)	81 (4.0)			1	560 (3.5)	422 (3.6)	138 (3.3)
Follow_up_death_5y (%)	0	7738 (89.5)	5906 (89.4)	1832 (89.9)	0.568	Follow_up_death_5y (%)	0	14036 (88.9)	10291 (88.6)	3745 (89.8)	0.031
	1	905 (10.5)	699 (10.6)	206 (10.1)			1	1753 (11.1)	1328 (11.4)	425 (10.2)

## Sheet: Table 3（多因素性别HR趋势表）
	Trend in 1-year Mortality(2007-2014)
years	female/male,death	HR	95%Cl	P for trend
2007	15/45	1.02	0.39-2.67	0.14
2008	16/43	2.01	0.89-4.57
2009	21/74	0.84	0.43-1.65
2010	29/77	1.04	0.51-2.12
2011	22/85	0.89	0.40-1.98
2012	43/75	1.09	0.65-1.83
2013	42/132	0.76	0.47-1.21
2014	31/130	0.66	0.39-1.12
	Trend in 5-year Mortality(2007-2014)
years	female/male,death	HR	95%Cl	P for trend
2007	40/121	1.23	0.64-2.36	0.0469
2008	35/383	0.91	0.54-1.53
2009	45/203	0.72	0.47-1.11
2010	86/241	1.04	0.70-1.56
2011	75/268	0.78	0.52-1.18
2012	123/280	0.9	0.67-1.22
2013	127/385	0.78	0.59-1.02
2014	100/395	0.59	0.44-0.79

## Sheet: Table 4（性别年龄趋势）
1y							5y
<60	female/male,death						<60	female/male,death
2007	7/54	1.75（1.49-2.05）		0.09			2007	7/54	1.80984	0.19-17.4	0.09
2008	10/56	3.28（0.75-14.4）					2008	10/56	0.665658	0.19-2.31
2009	11/76	0	0.26-1.89				2009	11/76	0.702111	0.26-1.89
2010	19/89	1.12547	0.38-3.35				2010	19/89	1.12547	0.38-3.35
2011	16/101	0.835193	0.28-2.45				2011	16/101	0.835193	0.28-2.45
2012	23/73	1.10781	0.54-2.27				2012	23/73	1.10781	0.54-2.27
2013	13/81	0.626496	0.25-1.56				2013	13/81	0.626496	0.25-1.56
2014	11/90	0.298517	0.11-0.78				2014	11/90	0.298517	0.11-0.78
60-75	female/male,death						60-75	female/male,death
2007	19/51	0.95	0.36-2.52	P=0.1869			2007	19/51	0.95	0.36-2.52	P=0.1869
2008	17/52	1.03	0.51-2.09				2008	17/52	1.03	0.51-2.09
2009	26/100	0.81	0.46-1.43				2009	26/100	0.81	0.46-1.43
2010	47/113	1.29	0.75-2.22				2010	47/113	1.29	0.75-2.22
2011	35/125	0.59	0.33-1.04				2011	35/125	0.59	0.33-1.04
2012	58/144	0.83	0.54-1.29				2012	58/144	0.83	0.54-1.29
2013	64/198	0.76	0.53-1.10				2013	64/198	0.76	0.53-1.10
2014	46/185	0.67	0.43-1.04				2014	46/185	0.67	0.43-1.04
>75	female/male,death						>75	female/male,death
2007	14/16	2.12	0.59-7.57	P=0.1954			2007	14/16	2.12	0.59-7.57	P=0.1954
2008	8-26	0.91	0.27-3.05				2008	8-26	0.91	0.27-3.05
2009	8-27	0.47	0.18-1.23				2009	8-27	0.47	0.18-1.23
2010	20/39	0.86	0.39-1.91				2010	20/39	0.86	0.39-1.91
2011	24/42	1.31	0.60-2.83				2011	24/42	1.31	0.60-2.83
2012	42/63	0.84	0.49-1.45				2012	42/63	0.84	0.49-1.45
2013	50/106	0.94	0.59-1.50				2013	50/106	0.94	0.59-1.50
2014	43/121	0.59	0.38-0.93				2014	43/121	0.59	0.38-0.93

## Sheet: Figure 1（性别比例占比趋势）
cad		female	total			<60			60-75				>75
2007	347	1215	1562		521	83	604		562	214	776		132	50	182
2008	418	1419	1837		625	86	711		619	260	879		175	72	247
2009	586	1868	2454		747	132	879		878	325	1203		243	129	372
2010	687	2103	2790		876	155	1031		947	380	1327		280	152	432
2011	798	2284	3082		947	194	1141		1050	432	1482		287	172	459
2012	955	2685	3640		1118	252	1370		1209	493	1702		358	210	568
2013	1184	3264	4448		1336	281	1617		1475	647	2122		453	256	709
2014	1233	3386	4619		1372	295	1667		1560	665	2225		454	273	727
AMI						pci
	2007	63	429			2007	232	873
	2008	85	426			2008	295	1049			2007	83	521	214	562	50	132
	2009	93	496			2009	407	1464			2008	86	625	260	619	72	175
	2010	81	437			2010	480	1624			2009	132	747	325	878	129	243
	2011	86	442			2011	526	1801			2010	155	876	380	947	152	280
	2012	151	623			2012	619	2052			2011	194	947	432	1050	172	287
	2013	159	732			2013	729	2457			2012	252	1118	493	1209	210	358
	2014	180	861			2014	826	2572			2013	281	1336	647	1475	256	453
											2014	295	1372	665	1560	273	454

## Sheet: Figure3（粗死亡率）
	男		#VALUE!						女
总	1094	121	1215	0.0995885		0.03686		307	40	347	0.115274		0.9912
	1285	134	1419	0.0944327				383	35	418	0.0837321
	1665	203	1868	0.108672				541	45	586	0.0767918
	1862	241	2103	0.114598				601	86	687	0.125182					male	female
	2016	268	2284	0.117338				723	75	798	0.093985				2007	10.5	11.5
	2405	280	2685	0.104283				832	123	955	0.128796				2008	9.4	8.4
	2879	385	3264	0.117953				1057	127	1184	0.107264				2009	10.9	7.7
	2991	395	3386	0.116657				1133	100	1233	0.081103				2010	11.5	12.5
															2011	11.7	9.4
															2012	10.4	12.9
															2013	11.8	10.7
															2014	11.7	8.1
男性<60						P for trend
2007	467	54	521	0.103647		0.02801		76	7	83	0.0843373		P=0.06
2008	569	56	625	0.0896				76	10	86	0.116279
2009	671	76	747	0.10174				121	11	132	0.0833333
2010	787	89	876	0.101598				136	19	155	0.122581
2011	846	101	947	0.106653				178	16	194	0.0824742
2012	1045	73	1118	0.0652952				229	23	252	0.0912698
2013	1255	81	1336	0.0606287				268	13	281	0.0462633
2014	1282	90	1372	0.0655977				284	11	295	0.0372881
男性60-75	511	51	562	0.0907473		0.01614		195	19	214	0.088785		P=0.7457
	567	52	619	0.0840065				243	17	260	0.0653846
	778	100	878	0.113895				299	26	325	0.08
	834	113	947	0.119324				333	47	380	0.123684
	925	125	1050	0.119048				397	35	432	0.0810185
	1065	144	1209	0.119107				435	58	493	0.117647
	1277	198	1475	0.134237				583	64	647	0.0989181
	1376	184	1560	0.117949				619	46	665	0.0691729
										0
男性>75	116	16	132	0.121212		0.005		36	14	50	0.28		P=0.988
	149	26	175	0.148571				64	8	72	0.111111
	216	27	243	0.111111				121	8	129	0.0620155
	241	39	280	0.139286				132	20	152	0.131579
	245	42	287	0.146341				148	24	172	0.139535
	295	63	358	0.175978				168	42	210	0.2
	347	106	453	0.233996				206	50	256	0.195312
	333	121	454	0.26652				230	43	273	0.157509
1-year	male					P= 0.49		female					P=0.19
	1173	42	1215	0.0345679				332	15	347	0.0432277
	1376	43	1419	0.030303				402	16	418	0.0382775
	1794	74	1868	0.0396146				565	21	586	0.0358362
	2026	77	2103	0.0366144				658	29	687	0.0422125
	2199	85	2284	0.0372154				776	22	798	0.0275689
	2610	75	2685	0.027933				912	43	955	0.0450262
	3132	132	3264	0.0404412				1142	42	1184	0.035473
	3256	130	3386	0.0383934				1202	31	1233	0.0251419
	509	12	521	0.0230326		P=0.71		80	3	83	0.0361446		P=0.04
	610	15	625	0.024				80	6	86	0.0697674
	719	28	747	0.0374833				128	4	132	0.030303
	850	26	876	0.0296804				150	5	155	0.0322581
	916	31	947	0.032735				187	7	194	0.0360825
	1096	22	1118	0.019678				245	7	252	0.0277778
	1308	28	1336	0.0209581				275	6	281	0.0213523
	1334	38	1372	0.0276968				292	3	295	0.0101695
	540	22	562	0.0391459		P=0.46		207	7	214	0.0327103		P = 0.74
	604	15	619	0.0242326				252	8	260	0.0307692
	845	33	878	0.0375854				314	11	325	0.0338462
	906	41	947	0.0432946				362	17	379	0.0448549
	1012	38	1050	0.0361905				425	7	432	0.0162037
	1170	39	1209	0.0322581				473	20	493	0.040568
	1412	63	1475	0.0427119				625	22	647	0.0340031
	1500	60	1560	0.0384615				648	17	665	0.0255639
	124	8	132	0.0606061		P=0.63		45	5	50	0.1		P=0.55
	162	13	175	0.0742857				70	2	72	0.0277778
	230	13	243	0.0534979				123	6	129	0.0465116
	270	10	280	0.0357143				145	7	152	0.0460526
	271	16	287	0.0557491				164	8	172	0.0465116
	344	14	358	0.0391061				194	16	210	0.0761905
	412	41	453	0.0905077				242	14	256	0.0546875
	422	32	454	0.0704846				262	11	273	0.040293

## Sheet: Table S1
	level	Overall	1	2	3	4	5	6	7	8	p	test
n		24432	1562	1837	2454	2790	3082	3640	4448	4619
age (mean (SD))		62.96 (10.72)	62.31 (10.87)	62.30 (10.72)	63.22 (10.83)	63.05 (10.85)	62.84 (10.68)	62.89 (10.81)	63.10 (10.68)	63.26 (10.49)	0.007
age_3 (%)	1	9020 (36.9)	604 (38.7)	711 (38.7)	879 (35.8)	1031 (37.0)	1141 (37.0)	1370 (37.6)	1617 (36.4)	1667 (36.1)	0.013
	2	11716 (48.0)	776 (49.7)	879 (47.8)	1203 (49.0)	1327 (47.6)	1482 (48.1)	1702 (46.8)	2122 (47.7)	2225 (48.2)
	3	3696 (15.1)	182 (11.7)	247 (13.4)	372 (15.2)	432 (15.5)	459 (14.9)	568 (15.6)	709 (15.9)	727 (15.7)
gender (%)	1	18224 (74.6)	1215 (77.8)	1419 (77.2)	1868 (76.1)	2103 (75.4)	2284 (74.1)	2685 (73.8)	3264 (73.4)	3386 (73.3)	<0.001
	2	6208 (25.4)	347 (22.2)	418 (22.8)	586 (23.9)	687 (24.6)	798 (25.9)	955 (26.2)	1184 (26.6)	1233 (26.7)
ICD_CAD (%)	1	24432 (100.0)	1562 (100.0)	1837 (100.0)	2454 (100.0)	2790 (100.0)	3082 (100.0)	3640 (100.0)	4448 (100.0)	4619 (100.0)	NA
ACS (%)	0	11064 (45.3)	498 (31.9)	747 (40.7)	990 (40.3)	1028 (36.8)	1178 (38.2)	1647 (45.2)	2505 (56.3)	2471 (53.5)	<0.001
	1	13368 (54.7)	1064 (68.1)	1090 (59.3)	1464 (59.7)	1762 (63.2)	1904 (61.8)	1993 (54.8)	1943 (43.7)	2148 (46.5)
AMI (%)	0	19088 (78.1)	1070 (68.5)	1326 (72.2)	1865 (76.0)	2272 (81.4)	2554 (82.9)	2866 (78.7)	3557 (80.0)	3578 (77.5)	<0.001
	1	5344 (21.9)	492 (31.5)	511 (27.8)	589 (24.0)	518 (18.6)	528 (17.1)	774 (21.3)	891 (20.0)	1041 (22.5)
ICD_STEMI (%)	0	20026 (82.0)	1090 (69.8)	1348 (73.4)	1900 (77.4)	2310 (82.8)	2579 (83.7)	3019 (82.9)	3847 (86.5)	3933 (85.1)	<0.001
	1	4406 (18.0)	472 (30.2)	489 (26.6)	554 (22.6)	480 (17.2)	503 (16.3)	621 (17.1)	601 (13.5)	686 (14.9)
ICD_NSTEMI (%)	0	23883 (97.8)	1542 (98.7)	1815 (98.8)	2420 (98.6)	2752 (98.6)	3057 (99.2)	3551 (97.6)	4314 (97.0)	4432 (96.0)	<0.001
	1	549 (2.2)	20 (1.3)	22 (1.2)	34 (1.4)	38 (1.4)	25 (0.8)	89 (2.4)	134 (3.0)	187 (4.0)
ICD_UA (%)	0	16555 (67.8)	986 (63.1)	1256 (68.4)	1577 (64.3)	1543 (55.3)	1697 (55.1)	2439 (67.0)	3469 (78.0)	3588 (77.7)	<0.001
	1	7877 (32.2)	576 (36.9)	581 (31.6)	877 (35.7)	1247 (44.7)	1385 (44.9)	1201 (33.0)	979 (22.0)	1031 (22.3)
ICD_HT (%)	0	10816 (44.3)	755 (48.3)	821 (44.7)	1107 (45.1)	1331 (47.7)	1336 (43.3)	1603 (44.0)	1947 (43.8)	1916 (41.5)	<0.001
	1	13616 (55.7)	807 (51.7)	1016 (55.3)	1347 (54.9)	1459 (52.3)	1746 (56.7)	2037 (56.0)	2501 (56.2)	2703 (58.5)
ICD_DM (%)	0	18140 (74.2)	1216 (77.8)	1408 (76.6)	1827 (74.4)	2084 (74.7)	2238 (72.6)	2669 (73.3)	3302 (74.2)	3396 (73.5)	0.001
	1	6292 (25.8)	346 (22.2)	429 (23.4)	627 (25.6)	706 (25.3)	844 (27.4)	971 (26.7)	1146 (25.8)	1223 (26.5)
ICD_AF (%)	0	23731 (97.1)	1513 (96.9)	1787 (97.3)	2392 (97.5)	2713 (97.2)	2988 (97.0)	3525 (96.8)	4329 (97.3)	4484 (97.1)	0.802
	1	701 (2.9)	49 (3.1)	50 (2.7)	62 (2.5)	77 (2.8)	94 (3.0)	115 (3.2)	119 (2.7)	135 (2.9)
CHF (%)	0	9573 (84.4)	828 (88.6)	950 (90.0)	1184 (91.1)	1029 (92.6)	1341 (94.4)	1382 (84.7)	1383 (73.2)	1476 (73.7)	<0.001
	1	1772 (15.6)	107 (11.4)	105 (10.0)	116 (8.9)	82 (7.4)	79 (5.6)	250 (15.3)	506 (26.8)	527 (26.3)
ICD_STROKE (%)	0	23270 (95.2)	1507 (96.5)	1759 (95.8)	2345 (95.6)	2683 (96.2)	2937 (95.3)	3467 (95.2)	4228 (95.1)	4344 (94.0)	<0.001
	1	1162 (4.8)	55 (3.5)	78 (4.2)	109 (4.4)	107 (3.8)	145 (4.7)	173 (4.8)	220 (4.9)	275 (6.0)
ICD_CANCER (%)	0	24164 (98.9)	1549 (99.2)	1811 (98.6)	2416 (98.5)	2759 (98.9)	3042 (98.7)	3605 (99.0)	4410 (99.1)	4572 (99.0)	0.108
	1	268 (1.1)	13 (0.8)	26 (1.4)	38 (1.5)	31 (1.1)	40 (1.3)	35 (1.0)	38 (0.9)	47 (1.0)
ICD_COPD (mean (SD))		0.01 (0.09)	0.01 (0.11)	0.01 (0.09)	0.01 (0.10)	0.01 (0.09)	0.01 (0.07)	0.01 (0.08)	0.01 (0.08)	0.01 (0.12)	<0.001
CKD (%)	0	17881 (77.5)	977 (71.0)	1185 (73.2)	1549 (71.3)	2056 (78.8)	2409 (80.2)	2800 (80.0)	3407 (79.0)	3498 (78.3)	<0.001
	1	5179 (22.5)	399 (29.0)	433 (26.8)	624 (28.7)	554 (21.2)	596 (19.8)	700 (20.0)	905 (21.0)	968 (21.7)
ICD_VHD (mean (SD))		0.06 (0.23)	0.04 (0.20)	0.05 (0.22)	0.06 (0.24)	0.05 (0.21)	0.06 (0.23)	0.05 (0.21)	0.06 (0.25)	0.07 (0.25)	<0.001
ICD_preAMI (%)	0	24432 (100.0)	1562 (100.0)	1837 (100.0)	2454 (100.0)	2790 (100.0)	3082 (100.0)	3640 (100.0)	4448 (100.0)	4619 (100.0)	NA
ICD_preCABG (%)	0	24432 (100.0)	1562 (100.0)	1837 (100.0)	2454 (100.0)	2790 (100.0)	3082 (100.0)	3640 (100.0)	4448 (100.0)	4619 (100.0)	NA
ICD_prePCI (%)	0	24432 (100.0)	1562 (100.0)	1837 (100.0)	2454 (100.0)	2790 (100.0)	3082 (100.0)	3640 (100.0)	4448 (100.0)	4619 (100.0)	NA
PCI (%)	0	6426 (26.3)	457 (29.3)	493 (26.8)	583 (23.8)	686 (24.6)	755 (24.5)	969 (26.6)	1262 (28.4)	1221 (26.4)	<0.001
	1	18006 (73.7)	1105 (70.7)	1344 (73.2)	1871 (76.2)	2104 (75.4)	2327 (75.5)	2671 (73.4)	3186 (71.6)	3398 (73.6)
DES (%)	0	7575 (31.0)	785 (50.3)	619 (33.7)	744 (30.3)	859 (30.8)	863 (28.0)	1050 (28.8)	1357 (30.5)	1298 (28.1)	<0.001
	1	16857 (69.0)	777 (49.7)	1218 (66.3)	1710 (69.7)	1931 (69.2)	2219 (72.0)	2590 (71.2)	3091 (69.5)	3321 (71.9)
BES (%)	0	23318 (95.4)	1182 (75.7)	1699 (92.5)	2267 (92.4)	2622 (94.0)	2994 (97.1)	3585 (98.5)	4383 (98.5)	4586 (99.3)	<0.001
	1	1114 (4.6)	380 (24.3)	138 (7.5)	187 (7.6)	168 (6.0)	88 (2.9)	55 (1.5)	65 (1.5)	33 (0.7)
CMV (mean (SD))		144.49 (82.40)	166.89 (95.57)	159.71 (92.02)	160.90 (88.69)	157.40 (89.91)	144.34 (80.73)	135.91 (75.84)	134.02 (77.13)	131.90 (70.95)	<0.001
Pre_CREA (mean (SD))		97.08 (64.30)	102.45 (63.48)	101.08 (48.64)	103.21 (69.42)	95.50 (49.74)	95.07 (70.21)	92.22 (61.17)	96.21 (64.48)	97.39 (72.56)	<0.001
eGFR (mean (SD))		78.28 (25.05)	72.67 (20.72)	72.16 (21.63)	71.15 (21.76)	77.97 (24.12)	81.24 (26.50)	82.84 (26.68)	79.44 (25.15)	79.48 (25.58)	<0.001
WBC (mean (SD))		8.15 (2.93)	8.33 (3.15)	8.55 (3.29)	8.20 (3.11)	8.20 (3.01)	8.11 (2.92)	8.03 (2.85)	8.07 (2.83)	8.08 (2.74)	<0.001
HGB (mean (SD))		133.06 (16.73)	133.79 (17.33)	134.70 (17.21)	133.44 (16.55)	132.91 (16.58)	132.89 (16.55)	132.64 (16.34)	133.52 (16.59)	132.17 (17.12)	<0.001
CHOL2 (mean (SD))		4.58 (1.19)	4.67 (1.23)	4.64 (1.18)	4.54 (1.14)	4.57 (1.16)	4.51 (1.17)	4.54 (1.18)	4.62 (1.20)	4.60 (1.24)	<0.001
TRIG2 (mean (SD))		1.62 (1.16)	1.56 (1.14)	1.65 (1.13)	1.64 (1.24)	1.60 (1.13)	1.55 (1.20)	1.57 (1.13)	1.69 (1.15)	1.63 (1.15)	<0.001
LDLC (median [IQR])		2.65 [2.09, 3.31]	2.51 [2.00, 3.10]	2.38 [1.90, 2.89]	2.77 [2.18, 3.38]	2.68 [2.14, 3.31]	2.56 [2.04, 3.17]	2.69 [2.09, 3.38]	2.79 [2.18, 3.49]	2.68 [2.08, 3.38]	<0.001	nonnorm
HDLC (median [IQR])		0.97 [0.82, 1.15]	1.04 [0.88, 1.25]	1.04 [0.88, 1.22]	1.00 [0.83, 1.19]	0.99 [0.82, 1.19]	0.90 [0.75, 1.06]	0.94 [0.80, 1.10]	0.97 [0.83, 1.14]	0.97 [0.82, 1.14]	<0.001	nonnorm
HbA1c (mean (SD))		6.56 (1.39)	6.50 (1.36)	6.57 (1.33)	6.55 (1.28)	6.53 (1.33)	6.62 (1.47)	6.67 (1.42)	6.52 (1.39)	6.49 (1.40)	0.002
LVEF (mean (SD))		59.70 (11.85)	60.19 (12.13)	59.25 (12.65)	60.46 (12.40)	60.38 (11.56)	59.14 (12.05)	59.71 (11.45)	59.34 (11.75)	59.48 (11.48)	0.002
acei_arb (%)	0	10680 (44.7)	545 (36.2)	616 (34.6)	758 (31.6)	1091 (40.1)	1253 (41.6)	1636 (45.8)	2340 (53.7)	2441 (53.8)	<0.001
	1	13194 (55.3)	962 (63.8)	1163 (65.4)	1641 (68.4)	1628 (59.9)	1756 (58.4)	1934 (54.2)	2018 (46.3)	2092 (46.2)
Drug_B_blocker (%)	0	4193 (17.6)	284 (18.8)	278 (15.6)	390 (16.3)	453 (16.7)	513 (17.0)	552 (15.5)	807 (18.5)	916 (20.2)	<0.001
	1	19681 (82.4)	1223 (81.2)	1501 (84.4)	2009 (83.7)	2266 (83.3)	2496 (83.0)	3018 (84.5)	3551 (81.5)	3617 (79.8)
Drug_Statins (%)	0	1470 (6.2)	173 (11.5)	170 (9.6)	140 (5.8)	150 (5.5)	158 (5.3)	167 (4.7)	256 (5.9)	256 (5.6)	<0.001
	1	22404 (93.8)	1334 (88.5)	1609 (90.4)	2259 (94.2)	2569 (94.5)	2851 (94.7)	3403 (95.3)	4102 (94.1)	4277 (94.4)
Drug_Aspirin (%)	0	2288 (9.6)	150 (10.0)	183 (10.3)	201 (8.4)	228 (8.4)	275 (9.1)	336 (9.4)	452 (10.4)	463 (10.2)	0.027
	1	21586 (90.4)	1357 (90.0)	1596 (89.7)	2198 (91.6)	2491 (91.6)	2734 (90.9)	3234 (90.6)	3906 (89.6)	4070 (89.8)
Drug_Clopidogrel (%)	0	3494 (14.6)	177 (11.7)	257 (14.4)	293 (12.2)	348 (12.8)	384 (12.8)	520 (14.6)	753 (17.3)	762 (16.8)	<0.001
	1	20380 (85.4)	1330 (88.3)	1522 (85.6)	2106 (87.8)	2371 (87.2)	2625 (87.2)	3050 (85.4)	3605 (82.7)	3771 (83.2)
Drug_CCB (%)	0	18669 (78.2)	1185 (78.6)	1345 (75.6)	1785 (74.4)	2130 (78.3)	2370 (78.8)	2892 (81.0)	3338 (76.6)	3624 (79.9)	<0.001
	1	5205 (21.8)	322 (21.4)	434 (24.4)	614 (25.6)	589 (21.7)	639 (21.2)	678 (19.0)	1020 (23.4)	909 (20.1)
Drug_PPI (%)	0	13669 (57.3)	945 (62.7)	845 (47.5)	914 (38.1)	1495 (55.0)	1949 (64.8)	2153 (60.3)	2849 (65.4)	2519 (55.6)	<0.001
	1	10205 (42.7)	562 (37.3)	934 (52.5)	1485 (61.9)	1224 (45.0)	1060 (35.2)	1417 (39.7)	1509 (34.6)	2014 (44.4)
Drug_OAD (%)	0	19712 (82.6)	1258 (83.5)	1492 (83.9)	1995 (83.2)	2231 (82.1)	2473 (82.2)	2927 (82.0)	3575 (82.0)	3761 (83.0)	0.477
	1	4162 (17.4)	249 (16.5)	287 (16.1)	404 (16.8)	488 (17.9)	536 (17.8)	643 (18.0)	783 (18.0)	772 (17.0)
dis_status (%)	0	66 (0.3)	3 (0.2)	3 (0.2)	4 (0.2)	5 (0.2)	5 (0.2)	5 (0.1)	19 (0.4)	22 (0.5)	<0.001
	1	24059 (98.5)	1520 (97.3)	1800 (98.0)	2404 (98.0)	2746 (98.4)	3027 (98.2)	3599 (98.9)	4395 (98.8)	4568 (98.9)
	2	216 (0.9)	30 (1.9)	18 (1.0)	29 (1.2)	26 (0.9)	28 (0.9)	22 (0.6)	34 (0.8)	29 (0.6)
	4	91 (0.4)	9 (0.6)	16 (0.9)	17 (0.7)	13 (0.5)	22 (0.7)	14 (0.4)	0 (0.0)	0 (0.0)
insurance_type (%)	1	5436 (22.3)	1011 (64.7)	1019 (55.5)	617 (25.1)	680 (24.4)	624 (20.2)	396 (10.9)	596 (13.6)	493 (10.7)	<0.001
	2	13168 (54.0)	414 (26.5)	616 (33.5)	1263 (51.5)	1444 (51.8)	1721 (55.8)	2089 (57.4)	2594 (59.1)	3027 (65.5)
	3	1407 (5.8)	124 (7.9)	138 (7.5)	188 (7.7)	184 (6.6)	172 (5.6)	196 (5.4)	200 (4.6)	205 (4.4)
	4	4358 (17.9)	13 (0.8)	64 (3.5)	386 (15.7)	482 (17.3)	565 (18.3)	956 (26.3)	998 (22.7)	894 (19.4)
cost_dollar (mean (SD))		8479.92 (6899.53)	NaN (NA)	NaN (NA)	NaN (NA)	NaN (NA)	NaN (NA)	7991.35 (6164.83)	8516.56 (7092.88)	8617.79 (6950.86)	0.006
Follow_up_death_365d (%)	0	23555 (96.4)	1505 (96.4)	1778 (96.8)	2359 (96.1)	2684 (96.2)	2975 (96.5)	3522 (96.8)	4274 (96.1)	4458 (96.5)	0.713
	1	877 (3.6)	57 (3.6)	59 (3.2)	95 (3.9)	106 (3.8)	107 (3.5)	118 (3.2)	174 (3.9)	161 (3.5)
Follow_up_death_5y (%)	0	21774 (89.1)	1401 (89.7)	1668 (90.8)	2206 (89.9)	2463 (88.3)	2739 (88.9)	3237 (88.9)	3936 (88.5)	4124 (89.3)	0.11
	1	2658 (10.9)	161 (10.3)	169 (9.2)	248 (10.1)	327 (11.7)	343 (11.1)	403 (11.1)	512 (11.5)	495 (10.7)

## Sheet: Table S2
	level	Overall	1	2	3	4	5	6	7	8	p	P for trend	Characteristic	Overall (N=18224)	2007	2008	2009	2010	2011	2012	2013	2014	P-value
n		18224	1215	1419	1868	2103	2284	2685	3264	3386			Demographics, n (%)
age (mean (SD))		61.84 (10.86)	61.38 (11.13)	61.10 (10.87)	62.09 (10.97)	61.88 (10.95)	61.71 (10.81)	61.78 (10.91)	61.96 (10.84)	62.18 (10.65)	0.053	0.008	Age, (years), mean (SD)	61.84 (10.86)	61.38 (11.13)	61.10 (10.87)	62.09 (10.97)	61.88 (10.95)	61.71 (10.81)	61.78 (10.91)	61.96 (10.84)	62.18 (10.65)	0.053
age_3 (%)	1	7542 (41.4)	521 (42.9)	625 (44.0)	747 (40.0)	876 (41.7)	947 (41.5)	1118 (41.6)	1336 (40.9)	1372 (40.5)	0.353		<60	7542 (41.4)	521 (42.9)	625 (44.0)	747 (40.0)	876 (41.7)	947 (41.5)	1118 (41.6)	1336 (40.9)	1372 (40.5)	0.353
	2	8300 (45.5)	562 (46.3)	619 (43.6)	878 (47.0)	947 (45.0)	1050 (46.0)	1209 (45.0)	1475 (45.2)	1560 (46.1)			60-75	8300 (45.5)	562 (46.3)	619 (43.6)	878 (47.0)	947 (45.0)	1050 (46.0)	1209 (45.0)	1475 (45.2)	1560 (46.1)
	3	2382 (13.1)	132 (10.9)	175 (12.3)	243 (13.0)	280 (13.3)	287 (12.6)	358 (13.3)	453 (13.9)	454 (13.4)			≥75	2382 (13.1)	132 (10.9)	175 (12.3)	243 (13.0)	280 (13.3)	287 (12.6)	358 (13.3)	453 (13.9)	454 (13.4)
AMI (%)	0	13778 (75.6)	786 (64.7)	993 (70.0)	1372 (73.4)	1666 (79.2)	1842 (80.6)	2062 (76.8)	2532 (77.6)	2525 (74.6)	<0.001		Insurance Type, n (%)
	1	4446 (24.4)	429 (35.3)	426 (30.0)	496 (26.6)	437 (20.8)	442 (19.4)	623 (23.2)	732 (22.4)	861 (25.4)			Self-paying	4240 (23.3)	809 (66.6)	807 (56.9)	481 (25.7)	543 (25.8)	480 (21.0)	305 (11.4)	457 (14.2)	358 (10.6)	<0.001
ICD_HT (%)	0	8754 (48.0)	632 (52.0)	689 (48.6)	913 (48.9)	1088 (51.7)	1077 (47.2)	1286 (47.9)	1538 (47.1)	1531 (45.2)			Urban insurance	9718 (53.5)	298 (24.5)	450 (31.7)	949 (50.8)	1049 (49.9)	1264 (55.3)	1552 (57.8)	1909 (59.3)	2247 (66.4)
	1												Rural insurance	1098 (6.0)	99 (8.1)	114 (8.0)	143 (7.7)	157 (7.5)	133 (5.8)	149 (5.6)	145 (4.5)	158 (4.7)
ICD_DM (%)	0	13914 (76.3)	963 (79.3)	1118 (78.8)	1432 (76.7)	1615 (76.8)	1704 (74.6)	2029 (75.6)	2484 (76.1)	2569 (75.9)			other	3122 (17.2)	9 (0.7)	48 (3.4)	295 (15.8)	354 (16.8)	407 (17.8)	677 (25.2)	709 (22.0)	623 (18.4)
	1												Discharge Diagnosis, n (%)
ICD_AF (%)	0	17750 (97.4)	1182 (97.3)	1386 (97.7)	1826 (97.8)	2049 (97.4)	2222 (97.3)	2602 (96.9)	3190 (97.7)	3293 (97.3)			AMI	4446 (24.4)	429 (35.3)	426 (30.0)	496 (26.6)	437 (20.8)	442 (19.4)	623 (23.2)	732 (22.4)	861 (25.4)	<0.001
	1												HT	9470 (52.0)	583 (48.0)	730 (51.4)	955 (51.1)	1015 (48.3)	1207 (52.8)	1399 (52.1)	1726 (52.9)	1855 (54.8)	<0.001
CHF (%)	0	6905 (84.0)	637 (88.8)	705 (89.9)	868 (90.8)	730 (91.7)	967 (94.1)	990 (84.6)	965 (72.9)	1043 (72.0)			DM	4310 (23.7)	252 (20.7)	301 (21.2)	436 (23.3)	488 (23.2)	580 (25.4)	656 (24.4)	780 (23.9)	817 (24.1)	0.025
	1												AF	474 (2.6)	33 (2.7)	33 (2.3)	42 (2.2)	54 (2.6)	62 (2.7)	83 (3.1)	74 (2.3)	93 (2.7)	0.564
ICD_STROKE (%)	0	17369 (95.3)	1169 (96.2)	1363 (96.1)	1783 (95.4)	2028 (96.4)	2178 (95.4)	2564 (95.5)	3106 (95.2)	3178 (93.9)			CHF	1317 (16.0)	80 (11.2)	79 (10.1)	88 (9.2)	66 (8.3)	61 (5.9)	180 (15.4)	358 (27.1)	405 (28.0)	<0.001
	1												Stroke	855 (4.7)	46 (3.8)	56 (3.9)	85 (4.6)	75 (3.6)	106 (4.6)	121 (4.5)	158 (4.8)	208 (6.1)	<0.001
ICD_CANCER (%)	0	18040 (99.0)	1204 (99.1)	1399 (98.6)	1842 (98.6)	2079 (98.9)	2258 (98.9)	2668 (99.4)	3237 (99.2)	3353 (99.0)			Cancer	184 (1.0)	11 (0.9)	20 (1.4)	26 (1.4)	24 (1.1)	26 (1.1)	17 (0.6)	27 (0.8)	33 (1.0)	0.147
	1												CKD	3651 (21.3)	299 (28.1)	300 (24.2)	449 (27.4)	385 (19.6)	411 (18.4)	483 (18.7)	631 (19.9)	693 (21.2)	<0.001
CKD (%)	0	13502 (78.7)	764 (71.9)	940 (75.8)	1192 (72.6)	1580 (80.4)	1818 (81.6)	2094 (81.3)	2534 (80.1)	2580 (78.8)			COPD	182 (1.0)	16 (1.3)	12 (0.8)	23 (1.2)	19 (0.9)	14 (0.6)	18 (0.7)	21 (0.6)	59 (1.7)	<0.001
	1												Procedure, n (%)
PCI (%)	0	4332 (23.8)	342 (28.1)	370 (26.1)	404 (21.6)	479 (22.8)	483 (21.1)	633 (23.6)	807 (24.7)	814 (24.0)			PCI	13892 (76.2)	873 (71.9)	1049 (73.9)	1464 (78.4)	1624 (77.2)	1801 (78.9)	2052 (76.4)	2457 (75.3)	2572 (76.0)	<0.001
	1												DES	12989 (71.3)	614 (50.5)	950 (66.9)	1351 (72.3)	1487 (70.7)	1709 (74.8)	1987 (74.0)	2388 (73.2)	2503 (73.9)	<0.001
DES (%)	0	5235 (28.7)	601 (49.5)	469 (33.1)	517 (27.7)	616 (29.3)	575 (25.2)	698 (26.0)	876 (26.8)	883 (26.1)			BES	881 (4.8)	305 (25.1)	109 (7.7)	136 (7.3)	130 (6.2)	77 (3.4)	46 (1.7)	47 (1.4)	31 (0.9)	<0.001
	1												CMV, mean (SD)	149.44 (84.02)	169.41 (97.01)	162.35 (93.54)	164.36 (89.75)	161.05 (91.14)	150.37 (82.45)	141.28 (78.01)	140.89 (80.08)	136.07 (71.54)	<0.001
BES (%)	0	17343 (95.2)	910 (74.9)	1310 (92.3)	1732 (92.7)	1973 (93.8)	2207 (96.6)	2639 (98.3)	3217 (98.6)	3355 (99.1)			Biochemical characteristics
	1												eGFR, mean (SD)	78.74 (24.22)	73.31 (20.35)	73.04 (20.54)	71.83 (21.64)	78.85 (23.32)	81.84 (25.73)	83.41 (25.42)	79.89 (24.09)	79.36 (25.00)	<0.001
CMV (mean (SD))													HGB, mean (SD)	136.37 (16.17)	137.08 (16.74)	137.98 (16.34)	135.98 (16.33)	135.87 (16.01)	136.17 (16.05)	136.03 (15.69)	137.29 (15.84)	135.60 (16.67)	<0.001
eGFR (mean (SD))		78.74 (24.22)	73.31 (20.35)	73.04 (20.54)	71.83 (21.64)	78.85 (23.32)	81.84 (25.73)	83.41 (25.42)	79.89 (24.09)	79.36 (25.00)	<0.001		LDL-C, median [IQR]	2.64 [2.08, 3.28]	2.49 [1.96, 3.07]	2.40 [1.90, 2.92]	2.76 [2.16, 3.35]	2.66 [2.12, 3.28]	2.54 [2.01, 3.14]	2.68 [2.07, 3.36]	2.78 [2.19, 3.48]	2.64 [2.06, 3.34]	<0.001
HGB (mean (SD))		136.37 (16.17)	137.08 (16.74)	137.98 (16.34)	135.98 (16.33)	135.87 (16.01)	136.17 (16.05)	136.03 (15.69)	137.29 (15.84)	135.60 (16.67)	<0.001		HDLC, median [IQR]	0.94 [0.80, 1.11]	1.00 [0.85, 1.19]	1.00 [0.85, 1.19]	0.97 [0.81, 1.15]	0.96 [0.80, 1.15]	0.87 [0.74, 1.03]	0.91 [0.78, 1.07]	0.94 [0.81, 1.09]	0.93 [0.80, 1.09]	<0.001
CHOL2 (mean (SD))		4.49 (1.16)	4.56 (1.21)	4.56 (1.16)	4.45 (1.10)	4.46 (1.10)	4.44 (1.15)	4.45 (1.14)	4.54 (1.18)	4.50 (1.21)	0.001		HbA1c, mean (SD)	6.50 (1.37)	6.41 (1.30)	6.53 (1.35)	6.49 (1.22)	6.47 (1.33)	6.60 (1.50)	6.58 (1.34)	6.47 (1.40)	6.43 (1.37)	0.024
LDLC (median [IQR])		2.64 [2.08, 3.28]	2.49 [1.96, 3.07]	2.40 [1.90, 2.92]	2.76 [2.16, 3.35]	2.66 [2.12, 3.28]	2.54 [2.01, 3.14]	2.68 [2.07, 3.36]	2.78 [2.19, 3.48]	2.64 [2.06, 3.34]	<0.001	nonnorm	LVEF, mean (SD)	58.95 (12.04)	59.24 (12.24)	58.58 (12.43)	59.33 (12.74)	59.62 (11.73)	58.37 (12.11)	59.17 (11.66)	58.80 (12.03)	58.66 (11.80)	0.124
HDLC (median [IQR])		0.94 [0.80, 1.11]	1.00 [0.85, 1.19]	1.00 [0.85, 1.19]	0.97 [0.81, 1.15]	0.96 [0.80, 1.15]	0.87 [0.74, 1.03]	0.91 [0.78, 1.07]	0.94 [0.81, 1.09]	0.93 [0.80, 1.09]	<0.001	nonnorm	Medication, n (%)
HbA1c (mean (SD))		6.50 (1.37)	6.41 (1.30)	6.53 (1.35)	6.49 (1.22)	6.47 (1.33)	6.60 (1.50)	6.58 (1.34)	6.47 (1.40)	6.43 (1.37)	0.024		ACEI/ARB	10185 (57.2)	772 (65.6)	927 (67.0)	1283 (70.3)	1262 (61.7)	1336 (59.9)	1484 (56.3)	1535 (48.0)	1586 (47.7)	<0.001
LVEF (mean (SD))		58.95 (12.04)	59.24 (12.24)	58.58 (12.43)	59.33 (12.74)	59.62 (11.73)	58.37 (12.11)	59.17 (11.66)	58.80 (12.03)	58.66 (11.80)	0.124		β-blocker	14783 (83.0)	969 (82.3)	1172 (84.7)	1535 (84.2)	1699 (83.1)	1859 (83.3)	2228 (84.5)	2649 (82.8)	2672 (80.4)	0.001
acei_arb (%)	0	7636 (42.8)	405 (34.4)	456 (33.0)	541 (29.7)	783 (38.3)	895 (40.1)	1154 (43.7)	1664 (52.0)	1738 (52.3)			Statins	16865 (94.6)	1050 (89.2)	1255 (90.7)	1732 (95.0)	1940 (94.9)	2135 (95.7)	2532 (96.0)	3057 (95.6)	3164 (95.2)	<0.001
	1												Aspirin	16345 (91.7)	1078 (91.6)	1246 (90.1)	1686 (92.4)	1890 (92.4)	2048 (91.8)	2430 (92.1)	2936 (91.8)	3031 (91.2)	0.238
Drug_B_blocker (%)	0	3038 (17.0)	208 (17.7)	211 (15.3)	289 (15.8)	346 (16.9)	372 (16.7)	410 (15.5)	550 (17.2)	652 (19.6)			Clopidogrel	15648 (87.8)	1059 (90.0)	1196 (86.5)	1623 (89.0)	1825 (89.2)	2015 (90.3)	2323 (88.1)	2772 (86.7)	2835 (85.3)	<0.001
	1												CCB	3526 (19.8)	238 (20.2)	307 (22.2)	432 (23.7)	400 (19.6)	433 (19.4)	473 (17.9)	668 (20.9)	575 (17.3)	<0.001
Drug_Statins (%)	0	956 (5.4)	127 (10.8)	128 (9.3)	92 (5.0)	105 (5.1)	96 (4.3)	106 (4.0)	142 (4.4)	160 (4.8)
	1
Drug_Aspirin (%)	0	1476 (8.3)	99 (8.4)	137 (9.9)	138 (7.6)	155 (7.6)	183 (8.2)	208 (7.9)	263 (8.2)	293 (8.8)
	1
Drug_Clopidogrel (%)	0	2173 (12.2)	118 (10.0)	187 (13.5)	201 (11.0)	220 (10.8)	216 (9.7)	315 (11.9)	427 (13.3)	489 (14.7)
	1
Drug_CCB (%)	0	14295 (80.2)	939 (79.8)	1076 (77.8)	1392 (76.3)	1645 (80.4)	1798 (80.6)	2165 (82.1)	2531 (79.1)	2749 (82.7)
	1

## Sheet: Table S3
	level	Overall	1										Characteristic	Overall (N=6208)	2007(N=347)	2008(N=418)	2009(N=586)	2010(N=687)	2011(N=798)	2012(N=955)	2013(N=1184)	2014(N=1233)	P-value
n		6208	347										Demographics, n (%)
age (mean (SD))		66.25 (9.55)	65.59 (9.19)										Age, (years), mean (SD)	66.25 (9.55)	65.59 (9.19)	66.36 (9.06)	66.83 (9.53)	66.64 (9.69)	66.07 (9.58)	66.01 (9.90)	66.26 (9.54)	66.22 (9.43)	0.547
age_3 (%)	1	1478 (23.8)	83 (23.9)										<60	1478 (23.8)	83 (23.9)	86 (20.6)	132 (22.5)	155 (22.6)	194 (24.3)	252 (26.4)	281 (23.7)	295 (23.9)	0.021
	2	3416 (55.0)	214 (61.7)										60-75	3416 (55.0)	214 (61.7)	260 (62.2)	325 (55.5)	380 (55.3)	432 (54.1)	493 (51.6)	647 (54.6)	665 (53.9)
	3	1314 (21.2)	50 (14.4)										≥75	1314 (21.2)	50 (14.4)	72 (17.2)	129 (22.0)	152 (22.1)	172 (21.6)	210 (22.0)	256 (21.6)	273 (22.1)
AMI (%)	0	5310 (85.5)	284 (81.8)										Insurance Type, n (%)
	1												Self-paying	1196 (19.3)	202 (58.2)	212 (50.7)	136 (23.2)	137 (19.9)	144 (18.0)	91 (9.5)	139 (11.9)	135 (10.9)	<0.001
ICD_HT (%)	0	2062 (33.2)	123 (35.4)										Urban insurance	3450 (55.7)	116 (33.4)	166 (39.7)	314 (53.6)	395 (57.5)	457 (57.3)	537 (56.3)	685 (58.6)	780 (63.3)
	1												Rural insurance	309 (5.0)	25 (7.2)	24 (5.7)	45 (7.7)	27 (3.9)	39 (4.9)	47 (4.9)	55 (4.7)	47 (3.8)
ICD_DM (%)	0	4226 (68.1)	253 (72.9)										other	1236 (20.0)	4 (1.2)	16 (3.8)	91 (15.5)	128 (18.6)	158 (19.8)	279 (29.2)	289 (24.7)	271 (22.0)
	1												Discharge Diagnosis, n (%)
ICD_AF (%)	0	5981 (96.3)	331 (95.4)										AMI	898 (14.5)	63 (18.2)	85 (20.3)	93 (15.9)	81 (11.8)	86 (10.8)	151 (15.8)	159 (13.4)	180 (14.6)	<0.001
	1												HT	4146 (66.8)	224 (64.6)	286 (68.4)	392 (66.9)	444 (64.6)	539 (67.5)	638 (66.8)	775 (65.5)	848 (68.8)	0.531
CHF (%)	0	2668 (85.4)	191 (87.6)										DM	1982 (31.9)	94 (27.1)	128 (30.6)	191 (32.6)	218 (31.7)	264 (33.1)	315 (33.0)	366 (30.9)	406 (32.9)	0.504
	1												AF	227 (3.7)	16 (4.6)	17 (4.1)	20 (3.4)	23 (3.3)	32 (4.0)	32 (3.4)	45 (3.8)	42 (3.4)	0.948
ICD_STROKE (%)	0	5901 (95.1)	338 (97.4)										CHF	455 (14.6)	27 (12.4)	26 (9.6)	28 (8.1)	16 (5.1)	18 (4.6)	70 (15.2)	148 (26.1)	122 (22.0)	<0.001
	1												Stroke	307 (4.9)	9 (2.6)	22 (5.3)	24 (4.1)	32 (4.7)	39 (4.9)	52 (5.4)	62 (5.2)	67 (5.4)	0.478
ICD_CANCER (%)	0	6124 (98.6)	345 (99.4)										Cancer	84 (1.4)	2 (0.6)	6 (1.4)	12 (2.0)	7 (1.0)	14 (1.8)	18 (1.9)	11 (0.9)	14 (1.1)	0.232
	1												CKD	1528 (25.9)	100 (31.9)	133 (35.2)	175 (32.9)	169 (26.2)	185 (23.8)	217 (23.5)	274 (23.9)	275 (23.1)	<0.001
CKD (%)	0	4379 (74.1)	213 (68.1)										COPD	31 (0.5)	2 (0.6)	2 (0.5)	1 (0.2)	3 (0.4)	2 (0.3)	6 (0.6)	7 (0.6)	8 (0.6)	0.841
	1												Procedure, n (%)
PCI (%)	0	2094 (33.7)	115 (33.1)										PCI	4114 (66.3)	232 (66.9)	295 (70.6)	407 (69.5)	480 (69.9)	526 (65.9)	619 (64.8)	729 (61.6)	826 (67.0)	0.002
	1												DES	3868 (62.3)	163 (47.0)	268 (64.1)	359 (61.3)	444 (64.6)	510 (63.9)	603 (63.1)	703 (59.4)	818 (66.3)	<0.001
DES (%)	0	2340 (37.7)	184 (53.0)										BES	233 (3.8)	75 (21.6)	29 (6.9)	51 (8.7)	38 (5.5)	11 (1.4)	9 (0.9)	18 (1.5)	2 (0.2)	<0.001
	1												CMV, mean (SD)	130.09 (75.66)	158.18 (90.05)	150.87 (86.27)	150.00 (84.39)	146.33 (85.15)	127.19 (72.98)	120.86 (67.19)	115.27 (64.87)	120.48 (68.03)	<0.001
BES (%)	0	5975 (96.2)	272 (78.4)										Biochemical characteristics
	1												eGFR, mean (SD)	76.94 (27.28)	70.68 (21.76)	69.30 (24.64)	69.07 (22.04)	75.31 (26.25)	79.47 (28.60)	81.23 (29.90)	78.22 (27.80)	79.83 (27.13)	<0.001
CMV (mean (SD))													HGB, mean (SD)	123.44 (14.48)	123.35 (14.88)	123.58 (15.34)	125.35 (14.52)	123.85 (14.92)	123.43 (14.17)	123.17 (14.28)	123.13 (13.96)	122.79 (14.65)	0.054
eGFR (mean (SD))													LDL-C, median [IQR]	2.71 [2.12, 3.38]	2.64 [2.06, 3.18]	2.34 [1.86, 2.85]	2.81 [2.23, 3.54]	2.79 [2.21, 3.41]	2.61 [2.09, 3.27]	2.71 [2.14, 3.44]	2.81 [2.16, 3.51]	2.75 [2.15, 3.46]	<0.001
WBC (mean (SD))		7.64 (2.78)	8.02 (3.30)										HDLC, median [IQR]	1.07 [0.90, 1.26]	1.18 [1.02, 1.38]	1.16 [0.99, 1.33]	1.11 [0.94, 1.31]	1.09 [0.90, 1.28]	0.99 [0.83, 1.16]	1.03 [0.87, 1.20]	1.08 [0.91, 1.26]	1.07 [0.92, 1.26]	<0.001
HGB (mean (SD))													HbA1c, mean (SD)	6.70 (1.43)	6.78 (1.50)	6.68 (1.27)	6.71 (1.42)	6.68 (1.35)	6.70 (1.37)	6.90 (1.60)	6.65 (1.36)	6.63 (1.46)	0.117
CHOL2 (mean (SD))		4.84 (1.24)	5.04 (1.23)										LVEF, mean (SD)	61.92 (10.98)	63.50 (11.16)	61.45 (13.13)	64.11 (10.46)	62.72 (10.71)	61.35 (11.60)	61.18 (10.73)	60.83 (10.82)	61.85 (10.15)	<0.001
LDLC (median [IQR])													Medication, n (%)
HDLC (median [IQR])													ACEI/ARB	3009 (49.7)	190 (57.6)	236 (59.6)	358 (62.3)	366 (54.3)	420 (54.0)	450 (48.3)	483 (41.7)	506 (41.9)	<0.001
HbA1c (mean (SD))													β-blocker	4898 (80.9)	254 (77.0)	329 (83.1)	474 (82.4)	567 (84.1)	637 (81.9)	790 (84.8)	902 (77.8)	945 (78.2)	<0.001
LVEF (mean (SD))													Statins	5539 (91.5)	284 (86.1)	354 (89.4)	527 (91.7)	629 (93.3)	716 (92.0)	871 (93.5)	1045 (90.2)	1113 (92.1)	0.001
acei_arb (%)	0	3044 (50.3)	140 (42.4)										Aspirin	5241 (86.6)	279 (84.5)	350 (88.4)	512 (89.0)	601 (89.2)	686 (88.2)	804 (86.3)	970 (83.7)	1039 (85.9)	0.006
	1												Clopidogrel	4732 (78.2)	271 (82.1)	326 (82.3)	483 (84.0)	546 (81.0)	610 (78.4)	727 (78.0)	833 (71.9)	936 (77.4)	<0.001
Drug_B_blocker (%)	0	1155 (19.1)	76 (23.0)										CCB	1679 (27.7)	84 (25.5)	127 (32.1)	182 (31.7)	189 (28.0)	206 (26.5)	205 (22.0)	352 (30.4)	334 (27.6)	<0.001
	1
Drug_Statins (%)	0	514 (8.5)	46 (13.9)
	1
Drug_Aspirin (%)	0	812 (13.4)	51 (15.5)
	1
Drug_Clopidogrel (%)	0	1321 (21.8)	59 (17.9)
	1
Drug_CCB (%)	0	4374 (72.3)	246 (74.5)
	1

## Sheet: Sheet3
man	61.38 (11.13)	61.10 (10.87)	62.09 (10.97)	61.88 (10.95)	61.71 (10.81)	61.78 (10.91)	61.96 (10.84)	62.18 (10.65)
female	65.59 (9.19)	66.36 (9.06)	66.83 (9.53)	66.64 (9.69)	66.07 (9.58)	66.01 (9.90)	66.26 (9.54)	66.22 (9.43)
male	61.4	61.1	62.1	61.9	61.7	61.8	62	62.2
femle	65.6	66.4	66.8	66.6	66.1	66	66.3	66.2
		male	femle			age65	male	female			male	female			male	female
	2007	61.4	65.6			2007	42.9	23.9		2007	46.3	61.7		2007	10.9	14.4
	2008	61.1	66.4			2008	44	20.6		2008	43.6	62.2		2008	12.3	17.2
	2009	62.1	66.8			2009	40	22.5		2009	47	55.5		2009	13	22
	2010	61.9	66.6			2010	41.7	22.6		2010	45	55.3		2010	13.3	22.1
	2011	61.7	66.1			2011	41.5	24.3		2011	46	54.1		2011	12.6	21.6
	2012	61.8	66			2012	41.6	26.4		2012	45	51.6		2012	13.3	22
	2013	62	66.3			2013	40.9	23.7		2013	45.2	54.6		2013	13.9	21.6
	2014	62.2	66.2			2014	40.5	23.9		2014	46.1	53.9		2014	13.5	22.1
				age65	1478 (23.8)	83 (23.9)	86 (20.6)	132 (22.5)	155 (22.6)	194 (24.3)	252 (26.4)	281 (23.7)	295 (23.9)	0.021	0.209
			女	age65_75	3416 (55.0)	214 (61.7)	260 (62.2)	325 (55.5)	380 (55.3)	432 (54.1)	493 (51.6)	647 (54.6)	665 (53.9)		0.001
				age75	1314 (21.2)	50 (14.4)	72 (17.2)	129 (22.0)	152 (22.1)	172 (21.6)	210 (22.0)	256 (21.6)	273 (22.1)		0.008
				521 (42.9)	625 (44.0)	747 (40.0)	876 (41.7)	947 (41.5)	1118 (41.6)	1336 (40.9)	1372 (40.5)
				562 (46.3)	619 (43.6)	878 (47.0)	947 (45.0)	1050 (46.0)	1209 (45.0)	1475 (45.2)	1560 (46.1)
				132 (10.9)	175 (12.3)	243 (13.0)	280 (13.3)	287 (12.6)	358 (13.3)	453 (13.9)	454 (13.4)
					415 (34.2)	413 (29.1)	467 (25.0)	406 (19.3)	425 (18.6)	509 (19.0)	502 (15.4)	575 (17.0)
					57 (16.4)	76 (18.2)	87 (14.8)	74 (10.8)	78 (9.8)	112 (11.7)	99 (8.4)	111 (9.0)
					PCI
					873 (71.9)	1049 (73.9)	1464 (78.4)	1624 (77.2)	1801 (78.9)	2052 (76.4)	2457 (75.3)	2572 (76.0)
					232 (66.9)	295 (70.6)	407 (69.5)	480 (69.9)	526 (65.9)	619 (64.8)	729 (61.6)	826 (67.0)
					PCI
					male	female					male	female	male	female
				2007	71.9	66.9				2007	34.2	16.4	1.2	1.7
				2008	73.9	70.6				2008	29.1	18.2	0.9	2.2
				2009	78.4	69.5				2009	25	14.8	1.5	1
				2010	77.2	69.9				2010	19.3	10.8	1.5	1
				2011	78.9	65.9				2011	18.6	9.8	0.7	1
				2012	76.4	64.8				2012	19	11.7	2.3	2.8
				2013	75.3	61.6				2013	15.4	8.4	3.2	2.5
				2014	76	67				2014	17	9	4.5	2.8
					14 (1.2)	13 (0.9)	28 (1.5)	31 (1.5)	17 (0.7)	62 (2.3)	104 (3.2)	153 (4.5)
					6 (1.7)	9 (2.2)	6 (1.0)	7 (1.0)	8 (1.0)	27 (2.8)	30 (2.5)	34 (2.8)
				HT		DM		CHF		CKD
				male	female	male	female	male	female	male	female		CHF
			2007	48	64.6	20.7	27.1	11.2	12.4	28.1	31.9
			2008	51.4	68.4	21.2	30.6	10.1	9.6	24.2	35.2
			2009	51.1	66.9	23.3	32.6	9.2	8.1	27.4	32.9
			2010	48.3	64.6	23.2	31.7	8.3	5.1	19.6	26.2
			2011	52.8	67.5	25.4	33.1	5.9	4.6	18.4	23.8
			2012	52.1	66.8	24.4	33	15.4	15.2	18.7	23.5
			2013	52.9	65.5	23.9	30.9	27.1	26.1	19.9	23.9
			2014	54.8	68.8	24.1	32.9	28	22	21.2	23.1
				<0.001	0.401	0.005	0.2	<0.001	<0.001	<0.001	<0.001
					0.153		0.687		0.566		0.07
		HT	583 (48.0)	730 (51.4)	955 (51.1)	1015 (48.3)	1207 (52.8)	1399 (52.1)	1726 (52.9)	1855 (54.8)
			224 (64.6)	286 (68.4)	392 (66.9)	444 (64.6)	539 (67.5)	638 (66.8)	775 (65.5)	848 (68.8)			PCI		CHF
													male	female	male	female
		DM	252 (20.7)	301 (21.2)	436 (23.3)	488 (23.2)	580 (25.4)	656 (24.4)	780 (23.9)	817 (24.1)		2007	71.9	66.9	11.2	12.4
			94 (27.1)	128 (30.6)	191 (32.6)	218 (31.7)	264 (33.1)	315 (33.0)	366 (30.9)	406 (32.9)		2008	73.9	70.6	10.1	9.6
												2009	78.4	69.5	9.2	8.1
		CHF	80 (11.2)	79 (10.1)	88 (9.2)	66 (8.3)	61 (5.9)	180 (15.4)	358 (27.1)	405 (28.0)		2010	77.2	69.9	8.3	5.1
			27 (12.4)	26 (9.6)	28 (8.1)	16 (5.1)	18 (4.6)	70 (15.2)	148 (26.1)	122 (22.0)		2011	78.9	65.9	5.9	4.6
												2012	76.4	64.8	15.4	15.2
		CKD	299 (28.1)	300 (24.2)	449 (27.4)	385 (19.6)	411 (18.4)	483 (18.7)	631 (19.9)	693 (21.2)		2013	75.3	61.6	27.1	26.1
			100 (31.9)	133 (35.2)	175 (32.9)	169 (26.2)	185 (23.8)	217 (23.5)	274 (23.9)	275 (23.1)		2014	76	67	28	22
													0.317	0.005	<0.001	<0.001
		高脂血症	11857 (68.0)	654 (58.9)	778 (58.1)	1121 (63.2)	1229 (62.1)	1646 (75.2)	1856 (71.8)	2259 (71.5)	2314 (70.4)		0.004			0.566
			3216 (54.2)	130 (40.8)	173 (43.4)	283 (51.4)	331 (50.6)	454 (59.7)	557 (60.8)	616 (54.2)	672 (56.1)
													CKD		hyperlipemia
													male	female	male	female
												2007	28.1	31.9	58.9	40.8
												2008	24.2	35.2	58.1	43.4
												2009	27.4	32.9	63.2	51.4
												2010	19.6	26.2	62.1	50.6
												2011	18.4	23.8	75.2	59.7
												2012	18.7	23.5	71.8	60.8
												2013	19.9	23.9	71.5	54.2
												2014	21.2	23.1	70.4	56.1
													<0.001	<0.001
														0.07	0.215

[truncated: 4 more sheets: Sheet5, Sheet6, Table 4, Sheet1]
